# Supplementary material for: Differential Effects of MitoVitE, α-Tocopherol and Trolox on Oxidative Stress, Mitochondrial Function and Inflammatory Signalling Pathways in Endothelial Cells Cultured under Conditions Mimicking Sepsis
Source: MDPI journal article supplement (doi:10.3390/antiox9030195), 2020-02-26
Supplement: s1 [file s1]

**Supplementary Table 1. Gene ID and function**

| Gene ID                            | Full gene name                                          | Summary of functions                                                                                                                                                                                                                   |
|------------------------------------|---------------------------------------------------------|----------------------------------------------------------------------------------------------------------------------------------------------------------------------------------------------------------------------------------------|
| <b>CD14</b>                        | Cluster of differentiation 14                           | Essential for TLR4 immune response. Binds to bacterial LPS and delivers it to MD-2/TLR 4 complex. Role in activation of MyD88, TIRAP and TRAF 6, leading to NFkB activation and cytokine secretion.                                    |
| <b>CEBPB/<br/>NF-IL-6<br/>beta</b> | Nuclear factor IL-6                                     | Specifically binds to an IL-1 response element in the IL-6 gene. Binds to regulatory regions of several acute-phase and cytokines genes. Interacts with PTGES2.                                                                        |
| <b>GUSB</b>                        | Glucuronidase beta                                      | Hydrolase that degrades glycosaminoglycans.                                                                                                                                                                                            |
| <b>IFNB1</b>                       | Interferon beta 1                                       | Early innate immune response cytokine                                                                                                                                                                                                  |
| <b>IRAK1</b>                       | Interleukin-1 receptor-associated kinase 1              | Has a role in IL-1 receptor activation. Binds to MyD88 which phosphorylates IRAK1 by IRAK4 and leads to NFkB activation.                                                                                                               |
| <b>IRAK4</b>                       | Interleukin-1-receptor-associated kinase 4              | Forms a complex with MyD88 and IRAK2. Phosphorylated IRAK4 associates with TRAF 6 and TIRAP and PELI1 this intermediate complex is required for NFkB activation.                                                                       |
| <b>IkBKB</b>                       | Inhibitor of nuclear factor kappa B kinase subunit beta | Critical role in the NFkB pathway as an enzyme complex of the canonical IKK complex. Phosphorylates inhibitors of NFkB on 2 critical serine residues and degrades them by the proteasome to allow NFkB translocation into the nucleus. |
| <b>MAP2K1</b>                      | Mitogen-activated protein kinase kinase 1               | Important component of the MAP kinase signal transduction pathway, binds cytokine ligands.                                                                                                                                             |
| <b>MAP3K1</b>                      | Mitogen-activated protein kinase kinase kinase 1        | A stress activated serine/threonine kinase ,plays a role in signal transduction cascades of the JNK kinase and the NFkB pathway.                                                                                                       |
| <b>MAPK8</b>                       | mitogen-activated protein kinase 8                      | Mediates early gene expression in response to LPS and pro-inflammatory cytokines and regulates JNK signalling                                                                                                                          |

|                 |                                                                                     |                                                                                                                                                                                  |
|-----------------|-------------------------------------------------------------------------------------|----------------------------------------------------------------------------------------------------------------------------------------------------------------------------------|
| <b>MAPK8IP3</b> | Mitogen-activated protein kinase 8 interacting protein 3                            | Role in the function of JNK signalling as a scaffold protein for MAPK cascade.                                                                                                   |
| <b>MYD88</b>    | Myeloid differentiation primary response gene 88 also known as TIRAP                | Adaptor protein involved in TLR2 and -4 and IL-1 signalling. Acts via IRAK1, IRAK2, IRF7 and TRAF 6, leading to NFκB activation, cytokine secretion and IL-8 transcription.      |
| <b>NFκB1</b>    | Nuclear factor of kappa light polypeptide gene enhancer in B-cells 1                | Has dual function of cytoplasmic retention of NFκB proteins by p105 and generates p50 by co-translational processing.                                                            |
| <b>NFκBIA</b>   | Nuclear factor of kappa light polypeptide gene enhancer in B-cells inhibitor, alpha | Retains the NFκB complexes in the cytoplasm until required in the nucleus. Also known as IκBα.                                                                                   |
| <b>PPAR-α</b>   | Peroxisome proliferator-activated receptor alpha                                    | Involved in the immune and inflammation responses and regulates fatty acid synthesis, oxidation and lipoprotein assembly.                                                        |
| <b>PTGS2</b>    | Prostaglandin-endoperoxide synthase 2                                               | Inducible key membrane protein in prostaglandin biosynthesis. NFκB can also induce PTGS2 expression. Also known as cyclo-oxygenase 2 (COX2).                                     |
| <b>RIPK2</b>    | Receptor interacting serine/threonine kinase 2                                      | Potent activator of NFκB especially by peptidoglycans. Activates tyrosine phosphorylation that leads to NFκB activation by NOD2.                                                 |
| <b>SOCS1</b>    | Suppressor of cytokine signalling 1                                                 | A negative regulator of cytokine signalling through the JAK/STAT3 pathway. Major regulator of IL-6.                                                                              |
| <b>SOCS3</b>    | Suppressor of cytokine signalling 3                                                 | A negative regulator of cytokine signalling through the JAK/STAT3 pathway by binding to tyrosine kinase receptors including gp130. Induced by various cytokines, including IL-6. |
| <b>STAT1</b>    | Signal transducer and activator of transcription 1                                  | Protein is phosphorylated by the receptor-associated kinases, translocates to the nucleus, and acts as transcription activator. Role in the activation of JAK kinases.           |
| <b>STAT3</b>    | Signal transducer and activator of transcription 3                                  | Part of JAK-STAT signalling cascade and are phosphorylated by receptor associated kinases in responses to IL-6. Localised in mitochondria.                                       |

|                             |                                                            |                                                                                                                                                                                                       |
|-----------------------------|------------------------------------------------------------|-------------------------------------------------------------------------------------------------------------------------------------------------------------------------------------------------------|
| <b>TAB1</b>                 | TGF-beta-activated kinase 1/map3k7-binding protein         | Regulator of MAP3K pathway mediating intracellular signalling induced by TGF- $\beta$ , IL-1. Interacts with TRAF 6 and MAP3K7 leading to NF $\kappa$ B activation                                    |
| <b>TBK1</b>                 | Tank binding kinase 1                                      | Involved in activation of TLRs by bacteria. Serine/threonine kinase with essential role in regulating inflammatory responses by mediating NF $\kappa$ B activation through phosphorylation of serine. |
| <b>TICAM1</b>               | Toll like receptor adaptor molecule 1 (also known as TRIF) | Facilitates protein-protein interactions for TLR4 and signal-transduction constituents, Recruits proteins TBK1, TRAF6 and RIPK1 which activates NF $\kappa$ B                                         |
| <b>TICAM2; TMED7-TICAM2</b> | Tmed7-ticam2 read through                                  | Negatively regulates MyD88-independent TLR4 pathway                                                                                                                                                   |
| <b>TOLLIP</b>               | Toll interacting protein                                   | Ubiquitin-binding protein interacts with TLR signalling cascades. Inhibits cell activation by bacterial products. Inhibits IRAK1 phosphorylation.                                                     |
| <b>TRAF6</b>                | TNF receptor-associated factor 6                           | Signal transducer in the Toll/IL-1 family and NF $\kappa$ B pathway                                                                                                                                   |
| <b>XPO1</b>                 | Exportin 1                                                 | Mediates export of cellular proteins (mRNA) between the nucleus and cytoplasm. Possible nuclear export inhibitor.                                                                                     |
